# Supplementary material for: A GATA4-regulated secretory program suppresses tumors through recruitment of cytotoxic CD8 T cells
Source: PubMed Central journal article supplement (PMC8752777; doi:10.1038/s41467-021-27731-5), 2022-01-11
Supplement: 41467_2021_27731_MOESM8_ESM.pdf [file 41467_2021_27731_MOESM8_ESM.pdf]

## Reporting Summary

Nature Research wishes to improve the reproducibility of the work that we publish. This form provides structure for consistency and transparency in reporting. For further information on Nature Research policies, see our [Editorial Policies](#) and the [Editorial Policy Checklist](#).

### Statistics

For all statistical analyses, confirm that the following items are present in the figure legend, table legend, main text, or Methods section.

- | n/a                      | Confirmed                                                                                                                                                                                                                                                                                      |
|--------------------------|------------------------------------------------------------------------------------------------------------------------------------------------------------------------------------------------------------------------------------------------------------------------------------------------|
| <input type="checkbox"/> | <input checked="" type="checkbox"/> The exact sample size ( $n$ ) for each experimental group/condition, given as a discrete number and unit of measurement                                                                                                                                    |
| <input type="checkbox"/> | <input checked="" type="checkbox"/> A statement on whether measurements were taken from distinct samples or whether the same sample was measured repeatedly                                                                                                                                    |
| <input type="checkbox"/> | <input checked="" type="checkbox"/> The statistical test(s) used AND whether they are one- or two-sided<br><i>Only common tests should be described solely by name; describe more complex techniques in the Methods section.</i>                                                               |
| <input type="checkbox"/> | <input checked="" type="checkbox"/> A description of all covariates tested                                                                                                                                                                                                                     |
| <input type="checkbox"/> | <input checked="" type="checkbox"/> A description of any assumptions or corrections, such as tests of normality and adjustment for multiple comparisons                                                                                                                                        |
| <input type="checkbox"/> | <input checked="" type="checkbox"/> A full description of the statistical parameters including central tendency (e.g. means) or other basic estimates (e.g. regression coefficient) AND variation (e.g. standard deviation) or associated estimates of uncertainty (e.g. confidence intervals) |
| <input type="checkbox"/> | <input checked="" type="checkbox"/> For null hypothesis testing, the test statistic (e.g. $F$ , $t$ , $r$ ) with confidence intervals, effect sizes, degrees of freedom and $P$ value noted<br><i>Give <math>P</math> values as exact values whenever suitable.</i>                            |
| <input type="checkbox"/> | <input checked="" type="checkbox"/> For Bayesian analysis, information on the choice of priors and Markov chain Monte Carlo settings                                                                                                                                                           |
| <input type="checkbox"/> | <input checked="" type="checkbox"/> For hierarchical and complex designs, identification of the appropriate level for tests and full reporting of outcomes                                                                                                                                     |
| <input type="checkbox"/> | <input checked="" type="checkbox"/> Estimates of effect sizes (e.g. Cohen's $d$ , Pearson's $r$ ), indicating how they were calculated                                                                                                                                                         |

*Our web collection on [statistics for biologists](#) contains articles on many of the points above.*

### Software and code

Policy information about [availability of computer code](#)

Data collection NA

Data analysis The custom source code used to analyze some of the TCGA data are provided at the following publicly available repository: <https://github.com/emmavatson/CNorm>. All other publicly available data analysis packages used in this study are described and referenced in the Methods section of the manuscript, these include: Annovar, SeqAn, Integrated Genomics Viewer, edgeR, Hisat2, featureCounts, subread, and GSEA.

For manuscripts utilizing custom algorithms or software that are central to the research but not yet described in published literature, software must be made available to editors and reviewers. We strongly encourage code deposition in a community repository (e.g. GitHub). See the Nature Research [guidelines for submitting code & software](#) for further information.

### Data

Policy information about [availability of data](#)

All manuscripts must include a [data availability statement](#). This statement should provide the following information, where applicable:

- Accession codes, unique identifiers, or web links for publicly available datasets
- A list of figures that have associated raw data
- A description of any restrictions on data availability

The RNA-Seq data are deposited in the Sequences Read Archive (SRA) with the project accession number PRJNA778768, Source data are provided with this paper. The remaining data are available within the Article, Supplementary Information or Source Data file.

## Field-specific reporting

Please select the one below that is the best fit for your research. If you are not sure, read the appropriate sections before making your selection.

Life sciences  Behavioural & social sciences  Ecological, evolutionary & environmental sciences

For a reference copy of the document with all sections, see [nature.com/documents/nr-reporting-summary-flat.pdf](https://www.nature.com/documents/nr-reporting-summary-flat.pdf)

## Life sciences study design

All studies must disclose on these points even when the disclosure is negative.

|                 |                                                                                                                                                                                                       |
|-----------------|-------------------------------------------------------------------------------------------------------------------------------------------------------------------------------------------------------|
| Sample size     | Sample sizes were pre-determined based on feasibility of study and standard practice for the field.                                                                                                   |
| Data exclusions | No data were excluded.                                                                                                                                                                                |
| Replication     | Replicates in the form of multiple tumors from multiple mice were analyzed for every experiment. In several cases (which we noted in the text) we performed the entire mouse experiment in duplicate. |
| Randomization   | Randomization not relevant to study                                                                                                                                                                   |
| Blinding        | Blinding not relevant to study                                                                                                                                                                        |

## Reporting for specific materials, systems and methods

We require information from authors about some types of materials, experimental systems and methods used in many studies. Here, indicate whether each material, system or method listed is relevant to your study. If you are not sure if a list item applies to your research, read the appropriate section before selecting a response.

### Materials & experimental systems

|                                     |                                                                 |
|-------------------------------------|-----------------------------------------------------------------|
| n/a                                 | Involved in the study                                           |
| <input type="checkbox"/>            | <input checked="" type="checkbox"/> Antibodies                  |
| <input type="checkbox"/>            | <input checked="" type="checkbox"/> Eukaryotic cell lines       |
| <input checked="" type="checkbox"/> | <input type="checkbox"/> Palaeontology and archaeology          |
| <input type="checkbox"/>            | <input checked="" type="checkbox"/> Animals and other organisms |
| <input checked="" type="checkbox"/> | <input type="checkbox"/> Human research participants            |
| <input checked="" type="checkbox"/> | <input type="checkbox"/> Clinical data                          |
| <input checked="" type="checkbox"/> | <input type="checkbox"/> Dual use research of concern           |

### Methods

|                                     |                                                    |
|-------------------------------------|----------------------------------------------------|
| n/a                                 | Involved in the study                              |
| <input checked="" type="checkbox"/> | <input type="checkbox"/> ChIP-seq                  |
| <input type="checkbox"/>            | <input checked="" type="checkbox"/> Flow cytometry |
| <input checked="" type="checkbox"/> | <input type="checkbox"/> MRI-based neuroimaging    |

## Antibodies

|                 |                                                                                                                                                                                                                                                                                                                                                                                                                                                                                                                                                                                                                                                                                                                                                                                                                                                                                                                                                                                                                                                                                                             |
|-----------------|-------------------------------------------------------------------------------------------------------------------------------------------------------------------------------------------------------------------------------------------------------------------------------------------------------------------------------------------------------------------------------------------------------------------------------------------------------------------------------------------------------------------------------------------------------------------------------------------------------------------------------------------------------------------------------------------------------------------------------------------------------------------------------------------------------------------------------------------------------------------------------------------------------------------------------------------------------------------------------------------------------------------------------------------------------------------------------------------------------------|
| Antibodies used | All antibodies used in the paper are described in the materials and methods section. The following antibodies were used for IHC: anti-phospho-Histone H3 (pHH3) (Ser10; Cell Signaling, 9701, 1:200, <a href="https://www.cellsignal.com/products/primary-antibodies/phospho-histone-h3-ser10-antibody/9701">https://www.cellsignal.com/products/primary-antibodies/phospho-histone-h3-ser10-antibody/9701</a> ), CD3 (Abcam, ab16669, 1:200, <a href="https://www.abcam.com/cd3-antibody-sp7-ab16669.html">https://www.abcam.com/cd3-antibody-sp7-ab16669.html</a> ), CD8 (Abcam, ab217344, 1:200, <a href="https://www.abcam.com/cd8-alpha-antibody-epr21769-ab217344.html">https://www.abcam.com/cd8-alpha-antibody-epr21769-ab217344.html</a> ), Ccl2-neutralizing antibody (#BE0185; BioXCell, 100 ug/100 uL, <a href="https://bxccl.com/product/m-r-h-ccl2-mcp-1/">https://bxccl.com/product/m-r-h-ccl2-mcp-1/</a> ), Anti-PD-1 antibody (#BP0273, BioXCell, <a href="https://bxccl.com/product/invivoplus-anti-mouse-pd-1-cd279/">https://bxccl.com/product/invivoplus-anti-mouse-pd-1-cd279/</a> ). |
| Validation      | All antibodies were purchased commercially from the company specified in the materials and methods for each antibody and authenticated by the manufacturer as described on their websites.                                                                                                                                                                                                                                                                                                                                                                                                                                                                                                                                                                                                                                                                                                                                                                                                                                                                                                                  |

## Eukaryotic cell lines

Policy information about [cell lines](#)

|                                                                   |                                                                                                                                                |
|-------------------------------------------------------------------|------------------------------------------------------------------------------------------------------------------------------------------------|
| Cell line source(s)                                               | Cell lines were purchased from ATCC; B16 murine melanoma cells & PyMT S2WTP3 murine breast cancer cells                                        |
| Authentication                                                    | Cell lines that were purchased from ATCC were previously authenticated by the ATCC using STR analysis, according to the product specification. |
| Mycoplasma contamination                                          | Cell lines were tested for mycoplasma and were negative.                                                                                       |
| Commonly misidentified lines (See <a href="#">ICLAC</a> register) | No commonly misidentified lines were used in this paper.                                                                                       |

## Animals and other organisms

Policy information about [studies involving animals](#); [ARRIVE guidelines](#) recommended for reporting animal research

|                         |                                                                                                                                                                                                                                                                                                                                                                                                     |
|-------------------------|-----------------------------------------------------------------------------------------------------------------------------------------------------------------------------------------------------------------------------------------------------------------------------------------------------------------------------------------------------------------------------------------------------|
| Laboratory animals      | Laboratory animal information and details are provided in the methods or in the figure legends and also in the text, depending on the experiment. GEMM model: KrasLSL-G12D/+; p53fl/fl; Rosa26LSL-Cas9 (KPC) mice. KPC mice were maintained on a mixed C57BL/6:SV129 genetic background. C57BL/6 mice and CD57BL/6 Rag1 <sup>-/-</sup> mice were acquired from Jackson Labs and were of both sexes. |
| Wild animals            | No wild animals were used for this study.                                                                                                                                                                                                                                                                                                                                                           |
| Field-collected samples | No field-collected samples were used in the study.                                                                                                                                                                                                                                                                                                                                                  |
| Ethics oversight        | All animal studies described in this study were approved by the Brigham & Women's Hospital Institutional Animal Care and Use Committee or the MIT Institutional Animal Care and Use Committee ethical guidelines.                                                                                                                                                                                   |

Note that full information on the approval of the study protocol must also be provided in the manuscript.

## Flow Cytometry

### Plots

Confirm that:

- The axis labels state the marker and fluorochrome used (e.g. CD4-FITC).
- The axis scales are clearly visible. Include numbers along axes only for bottom left plot of group (a 'group' is an analysis of identical markers).
- All plots are contour plots with outliers or pseudocolor plots.
- A numerical value for number of cells or percentage (with statistics) is provided.

### Methodology

|                                                                                                                                                           |                                                                                                                                                                                                                                                                                                                                                                                                                                                                                                                                                                                                                                                                                                                                                                                                                                                                                                                                                                                                                                                                                                                                                                                                                                                                                                                                                                                                                                                                                                                                                                                                                                                                                                                                                                  |
|-----------------------------------------------------------------------------------------------------------------------------------------------------------|------------------------------------------------------------------------------------------------------------------------------------------------------------------------------------------------------------------------------------------------------------------------------------------------------------------------------------------------------------------------------------------------------------------------------------------------------------------------------------------------------------------------------------------------------------------------------------------------------------------------------------------------------------------------------------------------------------------------------------------------------------------------------------------------------------------------------------------------------------------------------------------------------------------------------------------------------------------------------------------------------------------------------------------------------------------------------------------------------------------------------------------------------------------------------------------------------------------------------------------------------------------------------------------------------------------------------------------------------------------------------------------------------------------------------------------------------------------------------------------------------------------------------------------------------------------------------------------------------------------------------------------------------------------------------------------------------------------------------------------------------------------|
| Sample preparation                                                                                                                                        | <p>Samples were described in the paper text and methods. For RNA-Seq Tumor tissues were frozen in RNAlater solution (Thermo #PAS-39542) and RNA was extracted using the RNeasy plus mini kit (Qiagen #74134). cDNA libraries were built using NEB Next Ultra RNA Library Prep Kit for Illumina (NEB #E7530S). Samples were multiplexed using NEB Next Multiplex Oligos for Illumina (NEB #E7710L).</p> <p>For Antibody depletion CD4-depleting antibody (#BP0003-1), CDS-depleting antibody (#BP0061), and the isotype control antibody (#BP0090) were acquired from BioXCell. Antibodies were diluted using dilution buffer (BioXCell #IP0070) to 100 ug/100 uL. 200ug of the relevant antibody mixture (100ug CD4-depleting antibody plus 100 ug isotype control antibody, 100ug CDS-depleting antibody plus 100ug isotype control antibody, 200 ug isotype control antibody, or 100 ug CD4-depleting antibody plus 100 ug CDS-depleting antibody) were given to each mouse 1 day before tumor cell transplant and every 3 days subsequently. Circulating lymphocytes were profiled by collecting peripheral blood and flow cytometric analysis. For Immunohistochemistry</p> <p>Mice were euthanized by carbon dioxide asphyxiation. Lungs were perfused through the trachea with 4% paraformaldehyde (PFA), fixed overnight, transferred to 70% ethanol and subsequently embedded in paraffin. Sections were cut at a thickness of four micrometers and stained with H&amp;E for pathological examination. Chromogenic immunohistochemistry (IHC) was performed on a Ventana Medical Systems Discovery XT instrument with online deparaffinization using Ventana's reagents and detection kits and antigen retrieved in Ventana Cell Conditioner 1 or 2.</p> |
| Instrument                                                                                                                                                | The instrument used was a BD LSRII.                                                                                                                                                                                                                                                                                                                                                                                                                                                                                                                                                                                                                                                                                                                                                                                                                                                                                                                                                                                                                                                                                                                                                                                                                                                                                                                                                                                                                                                                                                                                                                                                                                                                                                                              |
| Software                                                                                                                                                  | FacsDIVA was used to collect the data and FlowJo was used for all flow cytometry data analysis.                                                                                                                                                                                                                                                                                                                                                                                                                                                                                                                                                                                                                                                                                                                                                                                                                                                                                                                                                                                                                                                                                                                                                                                                                                                                                                                                                                                                                                                                                                                                                                                                                                                                  |
| Cell population abundance                                                                                                                                 | Information about cell population abundance is in the paper and in the methods.                                                                                                                                                                                                                                                                                                                                                                                                                                                                                                                                                                                                                                                                                                                                                                                                                                                                                                                                                                                                                                                                                                                                                                                                                                                                                                                                                                                                                                                                                                                                                                                                                                                                                  |
| Gating strategy                                                                                                                                           | Gating strategies were utilized according to standard practice for flow cytometry.                                                                                                                                                                                                                                                                                                                                                                                                                                                                                                                                                                                                                                                                                                                                                                                                                                                                                                                                                                                                                                                                                                                                                                                                                                                                                                                                                                                                                                                                                                                                                                                                                                                                               |
| <input checked="" type="checkbox"/> Tick this box to confirm that a figure exemplifying the gating strategy is provided in the Supplementary Information. |                                                                                                                                                                                                                                                                                                                                                                                                                                                                                                                                                                                                                                                                                                                                                                                                                                                                                                                                                                                                                                                                                                                                                                                                                                                                                                                                                                                                                                                                                                                                                                                                                                                                                                                                                                  |
